# Supplementary material for: Comprehensive Analysis of G-Quadruplexes in African Swine Fever Virus Genome Reveals Potential Antiviral Targets by G-Quadruplex Stabilizers
Source: PubMed Central journal article supplement (PMC8718096; doi:10.3389/fmicb.2021.798431), 2021-12-16
Supplement: Data_Sheet_1.pdf [file Data_Sheet_1.pdf]

*Supplementary Material*

**Comprehensive analysis of G-quadruplexes in African Swine Fever Virus genome reveals potential antiviral targets by G-quadruplex stabilizers**

**Elishiba Muturi<sup>1,2</sup>, Fei Meng<sup>1</sup>, Huan Liu<sup>1,2</sup>, Mengwei Jiang<sup>1</sup>, Hongping Wei<sup>1,2\*</sup>, Hang Yang<sup>1,2\*</sup>**

<sup>1</sup>CAS Key Laboratory of Special Pathogens and Biosafety, Centre for Biosafety Mega-Science, Wuhan Institute of Virology, Chinese Academy of Sciences, Wuhan 430071, China.

<sup>2</sup>University of Chinese Academy of Sciences, Beijing 100049, China

**Table S1. Accession numbers of ASFV isolates used in this study**

| Genotype    | Isolate                                                                                                                                                                                                                                                                                                                                                                           |
|-------------|-----------------------------------------------------------------------------------------------------------------------------------------------------------------------------------------------------------------------------------------------------------------------------------------------------------------------------------------------------------------------------------|
| Genotype I  | ASFV_OURT_88_3_AM712240.1<br>ASFV_BA71_KP055815<br>ASFV_BA71V_NC001659<br>ASFV_NHV_KM262844<br>ASFV_L60_KM262844<br>ASFV_E75_FN557520<br>ASFV_Benin_97_1_AM712239<br>ASFV_47_Ss_2008_KX354450<br>ASFV_26544_OG10_KM102979                                                                                                                                                         |
| Genotype II | ASFV_China_2018_AnhuiXCGQ_MK128995<br>ASFV_Pol17_05838_C220_MG939589<br>ASFV_Pol17_04461_C210_MG939588<br>ASFV_Pol17_03029_C210_MG939587<br>ASFV_Pol16_29413_o23_MG939586<br>ASFV_Pol16_20186_o9_MG939584.1<br>ASFV_Pol16_20186_o7_MG939583<br>ASFV_Belgium_2018_1_LR536725.1<br>ASFV_Maldova_2017_1_PRJEB33279<br>ASFV_Georgia_2008_2_MH910496<br>ASFV_Georgia_2007_1_FR682468.2 |

Supplementary Material

|               |                                                                                                                                                                                                                                                    |
|---------------|----------------------------------------------------------------------------------------------------------------------------------------------------------------------------------------------------------------------------------------------------|
|               | <p>ASFV_Pol_2015_Podlaskie_MH681419</p> <p>ASFV_Georgia_2008_2_MH910495</p> <p>ASFV_Kashino_04_13_KJ747406</p> <p>ASFV_Estonia2014_LS478113</p> <p>ASFV_Odintovo02_14_KP843857</p> <p>ASFV_SY18_MH766894</p> <p>ASFV_Georgia_2007_1_FR682468.1</p> |
| Genotype III  | ASFV_Warmbaths_AY261365.1                                                                                                                                                                                                                          |
| Genotype IV   | ASFV_Warthog_AY261366                                                                                                                                                                                                                              |
| Genotype V    | ASFV_Tengani61_AY2613364.1                                                                                                                                                                                                                         |
| Genotype VIII | ASFV_Malawi_AY261361.1                                                                                                                                                                                                                             |
| Genotype IX   | <p>ASFV_N10_MH025916</p> <p>ASFV_R25_MH025918</p> <p>ASFV_Ken06bus_KM111295</p> <p>ASFV_R8_MH0225919</p> <p>ASFV_R35_MH025920</p> <p>ASFV_R7_MH025917</p>                                                                                          |
| Genotype X    | <p>ASFV_Ken05_Tk1_kM111294</p> <p>ASFV_Kenya_1950_AY261360</p>                                                                                                                                                                                     |
| Genotype XII  | ASFV_Mkuzi_1979_AY261362.1                                                                                                                                                                                                                         |
| Genotype XX   | ASFV_PR4_AY2613631                                                                                                                                                                                                                                 |

**Table S2. Sequence of PQS oligonucleotides used in this study with the strand position and the G-Scores as predicted by QGRS**

**Mapper.**

| PQS     | Position | Strand | Length (bp) | Sequence                                  | G Score | Conservation (%) | Gene    | Gene Function                                                                |
|---------|----------|--------|-------------|-------------------------------------------|---------|------------------|---------|------------------------------------------------------------------------------|
| PQS-31  | 34164    | +      | 14          | ggggaggagccagg                            | 31      | 98.2             | A859L   | Helicase superfamily I                                                       |
| PQS-104 | 74087    | +      | 23          | ggcttaagggcggggatatggg                    | 36      | 98.4             | C962R   | DNA primase                                                                  |
| PQS-113 | 77328    | +      | 11          | ggtggcggagg                               | 36      | 100.0            | B962L   | Helicase superfamily II                                                      |
| PQS-157 | 93995    | +      | 26          | ggtagaaaggcaatccggtcacc<br>gg             | 36      | 100.0            | G1340L  | VV A8L-like transcription factor                                             |
| PQS-172 | 97021    | +      | 38          | gggaaccgttccggacccaatca<br>ggcaaacgacgtgg | 36      | 98.9             | G1211R  | DNA polymerase family B                                                      |
| PQS-199 | 112021   | +      | 27          | ggcacttgatggttcaagtggtgg<br>agg           | 32      | 99.7             | O61R    | Attachment protein                                                           |
| PQS-210 | 115767   | +      | 20          | ggttgccgtggtggaaacgg                      | 36      | 99.9             | NP1450L | RNA polymerase subunit 1                                                     |
| PQS-235 | 127251   | +      | 23          | gggaaatggtggtgaggctcagg                   | 34      | 98.7             | D117L   | Required for progression of precursor membranes to icosahedral intermediates |
| PQS-239 | 128082   | +      | 26          | ggtggtctggctgggaggaagac<br>cgg            | 36      | 99.9             | D205R   | RNA polymerase subunit 5                                                     |
| PQS-243 | 130246   | +      | 23          | ggatatgtaaaggtatataagg                    | 33      | 99.9             | S273R   | SUMO-1-like protease                                                         |

Supplementary Material

|         |        |   |    |                               |    |      |        |                                                                                   |
|---------|--------|---|----|-------------------------------|----|------|--------|-----------------------------------------------------------------------------------|
| PQS-255 | 133084 | + | 25 | ggcacctgggaggaaaggatgca<br>gg | 35 | 98.0 | P1192R | DNA topoisomerase type II                                                         |
| PQS-283 | 145693 | + | 23 | ggttagaggtacctggttggtg        | 34 | 99.5 | E183L  | Binds to LC8 of dynein light chain;<br>Involved in virus entry                    |
| PQS-296 | 150524 | + | 18 | ggtggtgaaggggaatgg            | 32 | 99.9 | E248R  | Possible component of redox<br>pathway; Required for disulphide<br>bond formation |

---

**Table S3. Primers used for cloning of PQS into a pEGFP-N1 plasmid.**

| PQS     | Gene   | Forward primer (5'-3')             | Reverse primer (5'-3')                |
|---------|--------|------------------------------------|---------------------------------------|
| PQS-104 | C962R  | tatagctagcatgcgcgaggaatcatgggaagac | tatagtcgactgccattcccaccatttatttttg    |
| PQS-157 | G1340L | tatagctagcatggattccaaaatgac        | tatagtcgactgaaacttatttttacactaataattc |
| PQS-235 | D117L  | atatgctagcatggacactgaaacgtc        | tatagtcgactgtgaatgcgcaagtc            |
| PQS-255 | P1192R | atataagcttatggaagcgtttgaaatc       | tataggtaccgtatgaaattccactgag          |

Table S4. Sequence logos constructed by WebLogo software for 13 PQSs.

| PQS     | Sequence                                                                             |
|---------|--------------------------------------------------------------------------------------|
| PQS-31  |    |
| PQS-104 |    |
| PQS-113 |     |
| PQS-157 |    |
| PQS-172 |    |
| PQS-199 |  |
| PQS-210 |  |
| PQS-235 |  |
| PQS-239 |  |
| PQS-243 |  |
| PQS-255 |  |
| PQS-283 |  |
| PQS-296 |  |

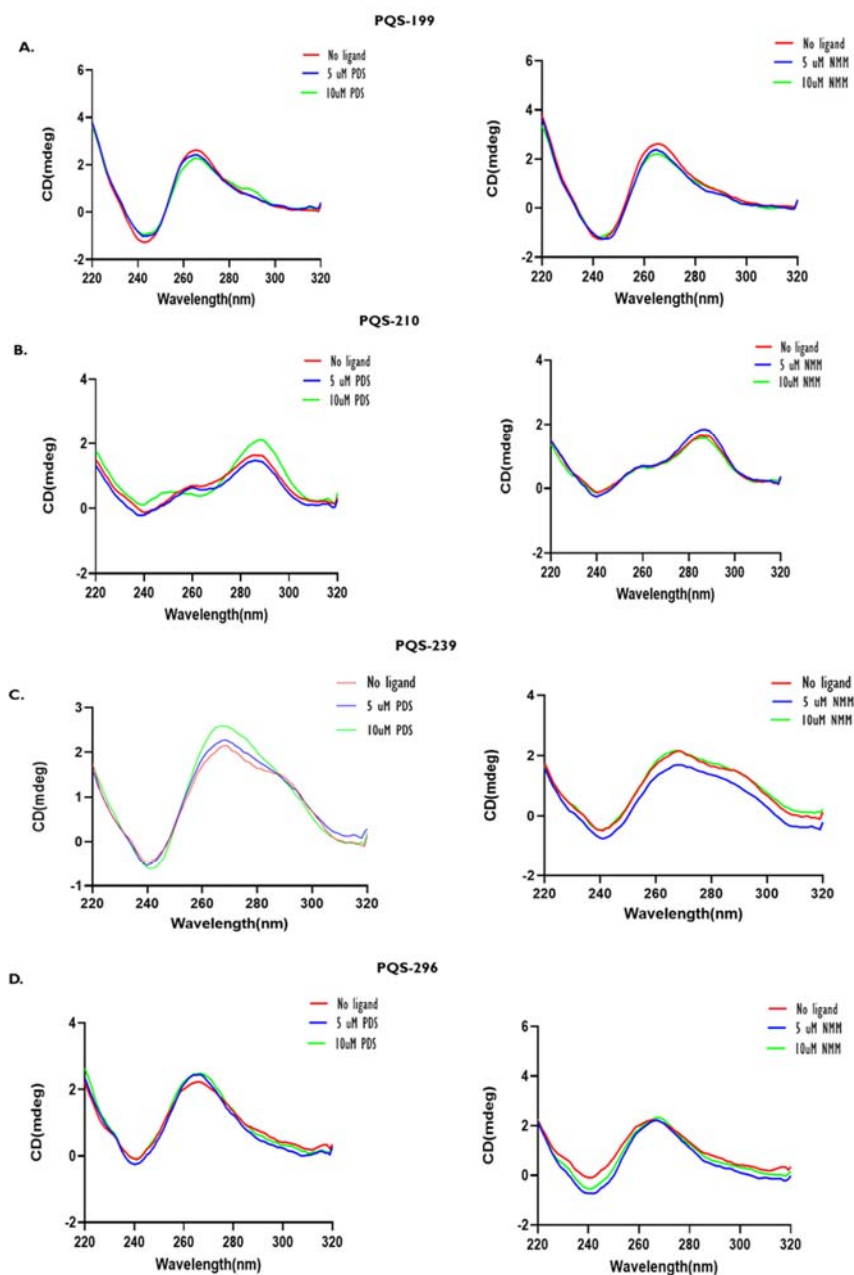

**Figure S1. Responses of PQS-199, PQS-210, PQS-239, and PQS-296 to G4 ligands.** CD spectra of PQS-199 (A), PQS-210 (B), PQS-239 (C), and PQS-296 (D) in the presence or absence of 5  $\mu$ M or 10  $\mu$ M NMM and PDS.
